# Supplementary material
Source: publisher figshare collection journal article supplement (https://gsapubs.figshare.com/ndownloader/files/22411647)
Supplement: Supplementary file 1 [file 22411647]

Archive with 4 entries (4 files):
- All Supplemental Tables.xlsx
- Supplemental Figure Caption.docx
- Supplemental Material 1.pdf
- Supplemental Text.docx
