# Supplementary material
Source: publisher figshare collection journal article supplement (https://gsapubs.figshare.com/ndownloader/files/22411647)
Supplement: Supplementary file 1 [file 22411647 › All Supplemental Tables.xlsx]

## Sheet: S1 Aspect Ratios
S1: Aspect ratios of meta-gabbros and eclogites. Values are dimensionless.
Kini: eclogite aspect ratios					Agios Dimitrios: eclogite aspect ratios
	Length	Width	Aspect Ratio			Length	Width	Aspect Ratio
meta-gabbros	2.27	1.4	1.62143		meta-gabbro	2.77	1.11	2.4955
	6.18	3.97	1.55668		sheared eclogites	6.08	1.6	3.8
	4.49	3.92	1.14541			3.49	0.36	9.69444
		AVERAGE	1.44117			0.79	0.27	2.92593
		MEDIAN	1.55668			0.64	0.17	3.76471
sheared eclogites	0.3967	0.1072	3.70056			0.5	0.19	2.63158
	0.228	0.2041	1.1171			1.68	0.25	6.72
	0.1288	0.0734	1.75477			2.65	1.06	2.5
	0.5452	0.1572	3.46819			0.79	0.27	2.92593
	0.2974	0.128	2.32344			0.82	0.33	2.48485
	0.7388	0.2438	3.03035			0.66	0.39	1.69231
	1.3235	0.1823	7.26001			0.96	0.35	2.74286
	0.2707	0.1885	1.43607			1.36	0.22	6.18182
	1.5483	0.2575	6.01282			0.47	0.18	2.61111
	0.7292	0.162	4.50123			7.98	0.55	14.5091
	0.7734	0.2641	2.92844			0.28	0.07	4
	1.652	0.3501	4.71865			0.25	0.05	5
	0.5953	0.3989	1.49235			0.23	0.05	4.6
	1.2953	0.1905	6.79948			0.24	0.04	6
	0.3648	0.1539	2.37037			0.4	0.12	3.33333
	0.2616	0.1232	2.12338			0.22	0.05	4.4
	0.3144	0.12333	2.54926			0.72	0.06	12
	1.5061	0.5424	2.77673			0.28	0.12	2.33333
	2	0.5547	3.60555			0.38	0.08	4.75
	1.1906	0.46	2.58826			0.43	0.09	4.77778
	0.6122	0.5833	1.04955			0.39	0.11	3.54545
	4.2508	0.7192	5.91046			0.59	0.13	4.53846
	2.1899	0.165	13.2721			0.14	0.08	1.75
	1.3696	0.2017	6.79028			0.38	0.18	2.11111
	1.2203	0.2313	5.27583			0.42	0.05	8.4
	1.3711	0.1696	8.08432			0.2	0.04	5
	4.2982	0.9655	4.45179			0.18	0.05	3.6
	3.9682	0.1751	22.6625			0.26	0.07	3.71429
	3.5232	0.6617	5.32447			0.3	0.1	3
	0.82	0.27	3.03704			0.39	0.03	13
	4.9	1.67	2.93413			0.77	0.05	15.4
	0.89	0.31	2.87097			0.36	0.03	12
	0.84	0.27	3.11111			0.36	0.16	2.25
	0.62	0.32	1.9375			0.29	0.07	4.14286
	0.62	0.16	3.875			0.24	0.04	6
	0.8	0.32	2.5			1.95	0.25	7.8
	0.5	0.19	2.63158				AVERAGE	5.31578
	3.86	0.49	7.87755				MEDIAN	4.07143
	1.89	0.63	3
	3.98	0.63	6.31746		Fabrikas: eclogite aspect ratios
	0.56	0.34	1.64706			Length	Width	Aspect Ratio
	0.58	0.22	2.63636		sheared eclogites	5.12	2.31	2.21645
	0.51	0.21	2.42857			5.35	1.17	4.57265
	0.53	0.28	1.89286			3.53	1.2	2.94167
	0.66	0.33	2			4.6	1.21	3.80165
	0.68	0.24	2.83333			3.42	1.41	2.42553
	1.92	0.51	3.76471			2.75	0.79	3.48101
	4	0.37	10.8108			2.89	0.71	4.07042
	3.61	1.26	2.86508			1.26	0.34	3.70588
	2.3	1.42	1.61972			4.02	1.31	3.0687
	0.58	0.1	5.8			2.45	0.97	2.52577
	1.18	0.06	19.6667			1.41	0.58	2.43103
	1.23	0.11	11.1818			0.93	0.41	2.26829
	7.67	0.88	8.71591			2.79	1.01	2.76238
		AVERAGE	4.76544			3.49	1.54	2.26623
		MEDIAN	3.03369			2.48	1	2.48
						2.5	0.76	3.28947
						3.55	1.58	2.24684
						3	2	1.5
						5	2	2.5
							AVERAGE	2.87126
							MEDIAN	2.52577

## Sheet: S2 Fracture Angles
S2: Angles between fractures and foliation at Kini and Fabrikas. Abbreviations are as follows: q = quartz, glc = glaucophane, ph = phengite, ecl = within eclogite, sb = shear band (within matrix).
KINI: angles between fractures and foliation					FABRIKAS: angles between fractures and foliation
Angle	Primary mineral fill	Secondary mineral fill	Comments		Angle	Primary mineral fill	Secondary mineral fill	Comments
55	q		ecl		-73	q		matrix
66	q		ecl		-58	q		matrix
47	q		ecl		-30	q		matrix
48	q		ecl		-39	q		ecl
63	glc		ecl		75	q		ecl
36	q		ecl		85	q		ecl
37	q	glc	ecl		30	q	glc	matrix
-24	q	glc	ecl		22	q	glc	matrix
-20	q		ecl		20	q	glc	matrix
18	q		ecl		30	sb		matrix
-26	q	glc	ecl		-89	q		ecl
-29	q		ecl		80	q	glc	ecl
-5	q		ecl		61	q	glc	ecl
-15	q		ecl		61	q	glc	ecl
27	q	glc	ecl		5	q		ecl
39	q		ecl		45	q	glc	ecl
47	q		ecl		60	q	glc	ecl
-42	q		ecl		60	q	glc	ecl
-53	q	zo	ecl		5	q		ecl
22	q	zo	ecl		3	q		ecl
-20	q		ecl		5	q		ecl
-45	q	ph	ecl		50	q	glc	ecl
12	q		ecl		65	q	glc	ecl
67	q		ecl		87	q	glc	ecl
-50	q		ecl		53	q	glc	ecl
66	q		ecl		80	q		ecl
-88	q		ecl		78	q		ecl
84	q		ecl		75	q		ecl
-30	q		ecl		80	q		ecl
82	ph		ecl		40	q		ecl
-75	q		ecl		78	q		ecl
20			ecl		22	sb		matrix
44			ecl		89	q	glc	ecl
64			ecl		45	q		ecl
43	q		ecl		45	q		ecl
75	q	glc	ecl		85	q		ecl
-33	q	glc	ecl		78	q		ecl
43	q	glc	ecl		-5	q		ecl
					12	q		ecl
					68	q		ecl

## Sheet: S3 Brittle Offset
S3: Brittle offset measurements along shear fractures in eclogite pods. Abbreviations are as follows: ep = epidote, act = actinolite, grt = garnet, glauc = glaucophanem, qtz = quartz
KINI: brittle offsets
ID	length (cm)	width (cm)	height (cm)	area (cm2)	ECR (cm)	ECD (cm)	volume (cm3)	offset (cm)	offset (mm)	notes	confidence (1-5)
1	10	2		20	2.52	5.04		1.25	12.5	elongate pod	3
1	10	2		20	2.52	5.04		0.95	9.5	elongate pod	3
2	17.75	1.58		28.045	2.99	5.98		2.05	20.5	foliation parallel layer	5
3	23.7	11.85		280.845	9.46	18.92		2.15	21.5	folded lens	5
4	15.8	5.9		93.22	5.45	10.9		0.5	5	veined pod	2
5	21.7	1.58		34.286	3.3	6.6		0.5	5	elongate pod with shear veins and pinches, did not measure boudin necks	2
6	9	2.5		22.5	2.68	5.36		0.35	3.5	elongate pod, boudinaged	2
7	28	3.95		110.6	5.93	11.86		1.5	15	elongate pod, boudinaged	3
8	6	2		12	1.95	3.9		0.35	3.5	boudinaged veined pod	4
9	29.6	1.95		57.72	4.29	8.58		1.35	13.5	folded eclogite lens, measurement for one limb of fold	5
9	29	0.95		27.55	2.96	5.92		0.55	5.5	folded eclogite lens, measurement for one limb of fold	5
9	31.5	6.4		201.6	8	16		0.5	5	boudinaged eclogite pod, measurement from faulted quartz vein	5
10	1.5	0.5		0.75	0.49	0.98		0.05	0.5	thin section	4
10	1.5	0.5		0.75	0.49	0.98		0.025	0.25	thin section	3
								minimum	0.25
								maximum	21.5
AGIOS DIMITRIOS: brittle offsets
ID	length (cm)	width (cm)	height (cm)	area (cm2)	ECR (cm)	ECD (cm)	volume (cm3)	offset (cm)	offset (mm)	notes	confidence
1	500	1000	300	500000	398	796	150000000	0.8	8	ep offsetting ep	5
1	500	1000	300	500000	398	796	150000000	0.3	3	ep offsetting ep	5
1	500	1000	300	500000	398	796	150000000	0.7	7	ep offsetting ep	5
1	500	1000	300	500000	398	796	150000000	1.75	17.5	act cutting ep	5
2	500	1000	300	500000	398	796	150000000	2.35	23.5	offset ep	5
2	500	1000	300	500000	398	796	150000000	1.9	19	ep offsetting grt	5
3	500	1000	300	500000	398	796	150000000	5.5	55	act cutting ep	3
3	500	1000	300	500000	398	796	150000000	0.6	6	quartz cutting ep	4
								minimum	3
								maximum	55
FABRIKAS: brittle offsets
ID	length (cm)	width (cm)	height (cm)	area (cm2)	ECR (cm)	ECD (cm)	volume (cm3)	offset (cm)	offest (mm)	notes	confidence
1	400	100	50	40000	112.8	225.6	2000000	6.35	63.5	sheared pod beneath fish; vertical crack, glauc qtz	5
1	400	100	50	40000	112.8	225.6	2000000	3.4	34	oblique, glauc	4
1	400	100	50	40000	112.8	225.6	2000000	3	30	oblique, glauc	4
1	400	100	50	40000	112.8	225.6	2000000	5.6	56	oblique, glauc	4
1	400	100	50	40000	112.8	225.6	2000000	31.5	315	oblique, qtz	5
1	400	100	50	40000	112.8	225.6	2000000	10.5	105	oblique, glc	5
1	400	100	50	40000	112.8	225.6	2000000	17.5	175	oblique, qtz	5
2	300	200	150	60000	138.2	276.4	9000000	1.75	17.5	sheared pod Y in same plane of fish	4
2	300	200	150	60000	138.2	276.4	9000000	0.87	8.7	sheared pod Y in same plane of fish	4
3								3.5	35	shear band in matrix, glc + qtz	5
3								1.75	17.5	shear band in matrix, glc + qtz	4
								minimum	8.7
								maximum	315

## Sheet: S4 Pod Dimensions (ECDs)
S4: Eclogite pod dimensions and Equivalent Circle Radii (ECRs) and Equivalent Circle Diameters (ECDs). For Fabrikas, pod dimensions documented for the eclogites shown in Figure 9 are in their own table. The percentage of heterogeneities in this particular outcrop is used to scale up to effective source areas in Table S5. For Agios Dimitrios, we estimate the dimensions of the single meta-gabbro in…
KINI: eclogite dimensions
#	ID	length (cm)	width (cm)	height (cm)	area (cm2)	volume (cm3)	ECR (cm)	ECD (cm)
1	1	10	2		20		2.52313	5.04627
2	1	10	2		20		2.52313	5.04627
3	2	17.75	1.58		28.045		2.98781	5.97562
4	3	23.7	11.85		280.845		9.45494	18.9099
5	4	15.8	5.9		93.22		5.44728	10.8946
6	5	21.7	1.58		34.286		3.30357	6.60714
7	6	9	2.5		22.5		2.67619	5.35237
8	7	28	3.95		110.6		5.93339	11.8668
9	8	6	2		12		1.95441	3.90882
10	9	29.6	1.95		57.72		4.28636	8.57272
11	9	29	0.95		27.55		2.96132	5.92265
12	9	31.5	6.4		201.6		8.0107	16.0214
13	10	1.5	0.5		0.75		0.488603	0.977205
14	10	1.5	0.5		0.75		0.488603	0.977205
15	11	11.63	4.65		54.0795		4.14898	8.29796
16	12	11	2		22		2.64628	5.29257
17	13	13	4		52		4.06843	8.13686
18	14	1.25	0.6		0.75		0.488603	0.977205
19	14	1.25	0.75		0.9375		0.546274	1.09255
20	14	1	0.5		0.5		0.398942	0.797885
21	14	1	0.3		0.3		0.309019	0.618039
22	14	1	0.5		0.5		0.398942	0.797885
23	15	35.6	2.25		80.1		5.04942	10.0988
24	16	2.37	1.6		3.792		1.09865	2.1973
								0
FABRIKAS: pod dimensions in Figure 9
#	ID	length (m)	width (m)	height (m)	area (m2)	volume (m3)	ECR (m)	ECD (m)
1	α	5.25	2	2.1	10.5	22.05	1.82818	3.65637
2	β	5.5	1	1.07	5.5	5.885	1.32314	2.64628
3	γ	3.15	1.4	1.05	4.41	4.6305	1.1848	2.3696
4	δ	4	1.4	1.05	5.6	5.88	1.33512	2.67023
5	ε	4	3.5	1	14	14	2.11101	4.22201
6	ζ	1	0.5	0.5	0.5	0.25	0.398942	0.797885
7	η	3	4	2	12	24	1.95441	3.90882
8	θ	5	2	2	10	20	1.78412	3.56825
				summed area	62.51		4.46067	8.92134
	outcrop area Fig. 9	25	8	3	200	600	7.97885	15.9577
	% heterogeneities in Fig. 9				31.255
FABRIKAS: other eclogite dimensions
#	ID	length (cm)	width (cm)	height (cm)	area (m2)	volume (cm3)	ECR (cm)	ECD (cm)
9	a	13.95	6.98		97.371		5.56724	11.1345
10	b	3.72	1.86		6.9192		1.48407	2.96813
11	b	11.63	4.65		54.0795		4.14898	8.29796
12	b	6.51	2.5		16.275		2.27607	4.55214
13	c	26.6	14		372.4		10.8875	21.7751
14	d	41.1	9.4		386.34		11.0895	22.1789
15	d	70.5	21.15		1491.07		21.7859	43.5717
16	e	43.5	12		522		12.8902	25.7805
17	e	18	4.8		86.4		5.24423	10.4885
18	e	54	8		432		11.7265	23.4529
19	f	11.63	6.51		75.7113		4.90914	9.81828
20	f	4.19	2.09		8.7571		1.66957	3.33915
21	f	12.35	5.23		64.5905		4.53429	9.06859
								0
AGIOS DIMITRIOS: metagabbro pod dimensions shown in Figure 7
#	ID	length (m)	width (m)	height (m)	area (m2)	volume (m3)	ECR (m)	ECD (m)
1	1	5	10	5	50	250	3.98942	7.97885
	estimated length based on avg. meta-gabbro aspect ratio 1.5:1	15	10	5	150	750	6.90989	13.8198
	total outcrop area				397600
	% heterogeneity				0.0377264

## Sheet: S5 Map and Source Area Calcs
Table S5: Map- and source-area estimates. See Supplementary Figure S1 for illustrations.
	maximum length, strike parallel (m)	maximum width, strike perpendicular (m)	total map area (m2)	width corrected for foliation dip, strike perpendicular (m)	map area, corrected for foliation dip (m2)
	l	w	At	wc	Af
Kini	850	485	412250	925	786250
Agios Dimitrios	400	994	397600	1310	524000
Fabrikas	609	245	149205	321	195489
	ratio of heterogeneities to matrix rocks	minimum effective source area (m2)	maximum effective source area (m2)
	R_hm	Ae_min	Ae_max
Kini	0.085	35041.2	66831.2
Agios Dimitrios	0.00038	151.088	199.12
Fabrikas	0.3	44761.5	58646.7
	total map area ECD minimum (m)	total map area ECD maximum (m)	effeftive source area ECD minimum (m)	effective source area ECD maximum (m)
Kini	724.495	1000.54	211.225	291.706
Agios Dimitrios	711.506	816.81	13.8698	15.9226
Fabrikas	435.86	498.903	238.73	273.261

## Sheet: S6 Tremor Mw (range of sourceA)
Table S6: All magnitude results for 30 and 40 Gpa rigidity, range of estimated source areas, and range of possible slip in (mm). Rows in grey italics are calculated for outcrop-scale source areas, and are not representative of the map-scale effective source area; therefore they are not included in minimum and maximum determinations.
Locality	Rigidity (GPa)	Source Area (m2)	Slip (mm)	Moment (N/m)	Magnitude
Kini	30	0.0229	1	687000	-2.17
	40	0.0229	1	916000	-2.09
	30	35000	0.01	10500000000	0.61
	40	35000	0.01	14000000000	0.69
	30	35000	0.1	105000000000	1.28
	40	35000	0.1	140000000000	1.36
	30	35000	1	1050000000000	1.94
	40	35000	1	1400000000000	2.03
	30	35000	10	10500000000000	2.61
	40	35000	10	14000000000000	2.69
	30	66000	0.01	19800000000	0.79
	40	66000	0.01	26400000000	0.88
	30	66000	0.1	198000000000	1.46
	40	66000	0.1	264000000000	1.54
	30	66000	1	1980000000000	2.13
	40	66000	1	2640000000000	2.21
				minimum	0.61
				maximum	2.69
Agios Dimitrios	30	50	1	1500000000	0.05
	40	50	1	2000000000	0.13
	30	50	5	7500000000	0.51
	40	50	5	10000000000	0.6
	30	50	10	15000000000	0.71
	40	50	10	20000000000	0.8
	30	50	20	30000000000	0.91
	40	50	20	40000000000	1
	30	150	1	4500000000	0.36
	40	150	1	6000000000	0.45
	30	150	5	22500000000	0.83
	40	150	5	30000000000	0.91
	30	150	10	45000000000	1.03
	40	150	10	60000000000	1.11
	30	150	20	90000000000	1.23
	40	150	20	120000000000	1.32
	30	200	1	6000000000	0.45
	40	200	1	8000000000	0.53
	30	200	5	30000000000	0.91
	40	200	5	40000000000	1
	30	200	10	60000000000	1.11
	40	200	10	80000000000	1.2
	30	200	20	120000000000	1.31
	40	200	20	160000000000	1.4
				minimum	0.36
				maximum	1.4
Fabrikas	30	63	10	18900000000	0.78
	40	63	10	25200000000	0.86
	30	63	20	37800000000	0.98
	40	63	20	50400000000	1.06
	30	63	50	94500000000	1.2
	40	63	50	126000000000	1.33
	30	63	100	189000000000	1.45
	40	63	100	252000000000	1.53
	30	63	200	378000000000	1.65
	40	63	200	504000000000	1.73
	30	44940	10	13482000000000	2.68
	40	44940	10	17976000000000	2.76
	30	44940	20	26964000000000	2.88
	40	44940	20	35952000000000	2.97
	30	44940	50	67410000000000	3.15
	40	44940	50	89880000000000	3.23
	30	44940	100	134820000000000	3.35
	40	44940	100	179760000000000	3.43
	30	44940	200	269640000000000	3.55
	40	44940	200	359520000000000	3.63
	30	58650	10	17595000000000	2.76
	40	58650	10	23460000000000	2.84
	30	58650	20	35190000000000	2.96
	40	58650	20	46920000000000	3.04
	30	58650	50	87975000000000	3.22
	40	58650	50	117300000000000	3.31
	30	58650	100	175950000000000	3.43
	40	58650	100	234600000000000	3.51
	30	58650	200	351900000000000	3.63
	40	58650	200	469200000000000	3.71
				minimum	2.68
				maximum	3.71

## Sheet: S7 Tremor Mw (observed slip)
Table S7: Range of estimated seismic moments and tremor magnitudes using (minimum) effective source area estimates and slip displacements measured in the field (listed in Table S3).
Locality	Rigidity (GPa)	Source Area (m2)	Slip (cm)	Slip (m)	Moment (N/m)	LOG MOMENT	Magnitude
Kini	30	35000	1.25	0.0125	13125000000000	13.1181	2.67
	30	35000	0.95	0.0095	9975000000000	12.9989	2.59
	30	35000	2.05	0.0205	21525000000000	13.3329	2.82
	30	35000	2.15	0.0215	22575000000000	13.3536	2.83
	30	35000	0.5	0.005	5250000000000	12.7202	2.41
	30	35000	0.5	0.005	5250000000000	12.7202	2.41
	30	35000	0.35	0.0035	3675000000000	12.5653	2.31
	30	35000	1.5	0.015	15750000000000	13.1973	2.73
	30	35000	0.35	0.0035	3675000000000	12.5653	2.31
	30	35000	1.35	0.0135	14175000000000	13.1515	2.7
	30	35000	0.55	0.0055	5775000000000	12.7616	2.44
	30	35000	0.5	0.005	5250000000000	12.7202	2.41
	30	35000	0.05	0.0005	525000000000	11.7202	1.74
	30	35000	0.025	0.00025	262500000000	11.4191	1.54
	40			0.0125	17500000000000	13.243	2.76
	40			0.0095	13300000000000	13.1239	2.68
	40			0.0205	28700000000000	13.4579	2.9
	40			0.0215	30100000000000	13.4786	2.91
	40			0.005	7000000000000	12.8451	2.49
	40			0.005	7000000000000	12.8451	2.49
	40			0.0035	4900000000000	12.6902	2.39
	40			0.015	21000000000000	13.3222	2.81
	40			0.0035	4900000000000	12.6902	2.39
	40			0.0135	18900000000000	13.2765	2.78
	40			0.0055	7700000000000	12.8865	2.52
	40			0.005	7000000000000	12.8451	2.49
	40			0.0005	700000000000	11.8451	1.83
	40			0.00025	350000000000	11.5441	1.62
						MINIMUM	1.54
						MAXIMUM	2.91
Agios Dimitrios	30	150	0.8	0.008	36000000000	10.5563	0.97
	30	150	0.3	0.003	13500000000	10.1303	0.68
	30	150	0.7	0.007	31500000000	10.4983	0.93
	30	150	1.75	0.0175	78750000000	10.8963	1.19
	30	150	2.35	0.0235	105750000000	11.0243	1.28
	30	150	1.9	0.019	85500000000	10.932	1.22
	30	150	5.5	0.055	247500000000	11.3936	1.53
	30	150	0.6	0.006	27000000000	10.4314	0.88
	40			0.008	48000000000	10.6812	1.05
	40			0.003	18000000000	10.2553	0.77
	40			0.007	42000000000	10.6232	1.01
	40			0.0175	105000000000	11.0212	1.28
	40			0.0235	141000000000	11.1492	1.36
	40			0.019	114000000000	11.0569	1.3
	40			0.055	330000000000	11.5185	1.61
	40			0.006	36000000000	10.5563	0.97
						MINIMUM	0.68
						MAXIMUM	1.61
Fabrikas	30	44940	6.35	0.0635	85610700000000	13.9325	3.22
	30	44940	3.4	0.034	45838800000000	13.6612	3.04
	30	44940	3	0.03	40446000000000	13.6069	3
	30	44940	5.6	0.056	75499200000000	13.8779	3.18
	30	44940	31.5	0.315	424683000000000	14.6281	3.68
	30	44940	10.5	0.105	141561000000000	14.1509	3.36
	30	44940	17.5	0.175	235935000000000	14.3728	3.5
	30	44940	1.75	0.0175	23593500000000	13.3728	2.84
	30	44940	0.87	0.0087	11729340000000	13.0693	2.64
	30	44940	3.5	0.035	47187000000000	13.6738	3.04
	30	44940	1.75	0.0175	23593500000000	13.3728	2.84
	40			0.0635	114147600000000	14.0575	3.3
	40			0.034	61118400000000	13.7862	3.12
	40			0.03	53928000000000	13.7318	3.08
	40			0.056	100665600000000	14.0029	3.2
	40			0.315	566244000000000	14.753	3.76
	40			0.105	188748000000000	14.2759	3.45
	40			0.175	314580000000000	14.4977	3.59
	40			0.0175	31458000000000	13.4977	2.93
	40			0.0087	15639120000000	13.1942	2.72
	40			0.035	62916000000000	13.7988	3.13
	40			0.0175	31458000000000	13.4977	2.93
						MINIMUM	2.64
						MAXIMUM	3.76
