# Supplementary material
Source: publisher figshare collection journal article supplement (https://gsapubs.figshare.com/ndownloader/files/22411647)
Supplement: Supplementary file 1 [file 22411647 › Supplemental Figure Caption.docx]

Supplemental Figure 1. Method for estimating total source areas and effective source areas for Kini, Agios Dimtrios, and Fabrikas. See supplementary text for discussion. (A) Blue patches are outcrop areas, or “total source areas.” (B) We calculate the minimum total source area by taking the product of outcrop length and width (At), and calculate a maximum total source area by correcting for the orientation of the dipping foliation (Af). A representative portion of outcrop, like that shown in (C) is used to estimate the ratio of heterogeneities to matrix (Rhm) for the total source areas (At and Af). Multiplying Rhm by At and Af gives a range in effective source area, Ae-min and Ae-max.
