# Supplementary material
Source: publisher figshare collection journal article supplement (https://gsapubs.figshare.com/ndownloader/files/22411647)
Supplement: Supplementary file 1 [file 22411647 › Supplemental Text.docx]

**6 Supplementary Material**

**6.1 Electron micro-beam methods**

***Qualitative X-Ray mapping.*** Qualitative x-ray compositional mapping was done on a Kini blueschist (KCS16K) on the JEOL JXA-8200 electron microprobe at the University of Texas at Austin. The polished 30 μm thin section was analyzed using a 15 kV accelerating voltage, focused beam, 300 nA current, 6 μm step size, and 1 ms dwell time. X-ray maps for Si, Al, Ca, Mg, Fe, Na, K, Mn, Ti, and P were collected. Post-processing and false color map creation was done in ImageJ software by merging element channels with assigned colors.

***Electron backscatter diffraction.*** Three representative matrix samples were selected for electron backscatter diffraction (EBSD) analyses; one from the uppermost meta-mafic unit (KCS16K) and two from the intermediate meta-sedimentary unit (KCS65 and KCS66). EBSD was used to measure lattice preferred orientations (LPOs) in glaucophane (KCS16K and KCS66) and quartz (KCS65), quantify intracrystalline plastic strain using Mis2Mean maps. Polished 30 μm thin sections were analyzed on the Philips/FEI XL30 Environmental Scanning Electron Microscope equipped with an Oxford EBSD detector at the University of Texas at Austin using a 20 kV accelerating voltage, 16-18 mm working distance, medium spot size, 75-150x magnification, and 2-6 μm step size. Large area maps were acquired using the Oxford Instruments AZTEC software (version XX). Post-processing was done using the MTEX toolbox version 5.1.1 in MATLAB (Bachmann et al., 2010). MTEX map post-processing includes noise reduction with a smoothing filter. MTEX was also used to create lower hemisphere projection contoured pole figures plotted as one point-per-grain, and to calculate fabric strength using M- and J-indices (Skemer et al., 2005; Bunge, 1982).

**6.2 Estimating Total and Effective Source Areas**

[Supplementary Figure 1 about here.]

To calculate outcrop area, or “total source area” (*At*), we multiply the maximum length (*l*) of the map-scale outcrop measured parallel to the strike of the foliation by the maximum width (*w*) of the body measured perpendicular to strike (Fig. 15). To account for the uncertainty in orientation of the source area with respect to the original orientation of the foliation (i.e. whether ruptures would have occurred on planes parallel to or at high angles to the foliation), we also consider the width perpendicular to foliation corrected for foliation dip (*wc*). We multiply *wc* by the maximum strike-parallel length (*l*) to calculate a map area corrected for foliation orientation (*Af*) (Fig. 15A,B). Both calculations are listed in Table S5.

To calculate the range of ‘effective source areas’ (*Aemin* and *Aemax* ), or the area capable of co-seismic deformation, we estimate the ratio of heterogeneity to matrix (*Rhm*) for selected representative outcrops and assume that this ratio approximates the ratio of heterogeneities through the total source area. For example, Fig. 15C shows a representative patch of eclogites contained in blueschist at Kini. The ratio of outlined black areas to matrix in Fig. 15D in this case is *Rhm* = 0.085 or 8.5%. The range of *Ae* is given by *At* and *Af* multiplied by *Rhm*. Seismic moment is then calculated by M0 = µ*AeD*, where µ is rock rigidity, *Ae* is the effective source area, and *D* is the displacement magnitude. We then convert seismic moment to tremor magnitude via: Mw = 2/3 log10 (M0) — 10.7 (Kanamori, 1986). We first explore the effects of “effective source area” on tremor magnitudes, using the ranges of effective source areas in Table S5; results are listed in Table S6. Then we use observed displacement magnitudes listed in Supplementary Table S3 to calculate a range of seismic moments and magnitudes, listed in Table S7. Together these values represent a full range of moment magnitudes, taking into account the errors in source area and displacement.

**6.3 Outcrop-specific descriptions**

An *Rhm* for Fabrikas of 0.3 was determined by summing the areas of eclogite pods as shown in Figure 9 and dividing it by the total outcrop area shown in the panoramic photo. This *Rhm* is more or less applicable to the entire Fabrikas locality, since the eclogites and coarse-grained metagabbros are similarly distributed along the entire ~600 m of coastal exposure. We multiply *Rhm* by *At* and *Af*to produce a range of effective source areas.

To determine *Rhm* for Agios Dimitrios, we assumed that the minimum effective source area is represented solely by the metagabbro in Figure 7A. The observed area of the meta-gabbro in outcrop is ~50 m2. This is an absolute minimum because the view in Fig. 7 is looking into the stretching direction, so it is unclear what the pod’s true length is. The average aspect ratios of meta-gabbros from Kini is 1.5:1 (see Figure 3). Using this aspect ratio, we estimate dimensions of the meta-gabbro are ~5x10m, thus the minimum area of the metagabbro is ~150 m2, which equates to ~0.03% of the total outcrop source area. This is a minimum *Rhm*, considering this calculation does not take into account the other smaller eclogites, and other large meta-gabbros, present at Agios Dimitrios. We multiply this range of *Rhm* by *At* and *Af* to produce a range of effective source areas 150-200 m2.
