# Supplementary material
Source: publisher figshare collection journal article supplement (https://gsapubs.figshare.com/ndownloader/files/22411647)

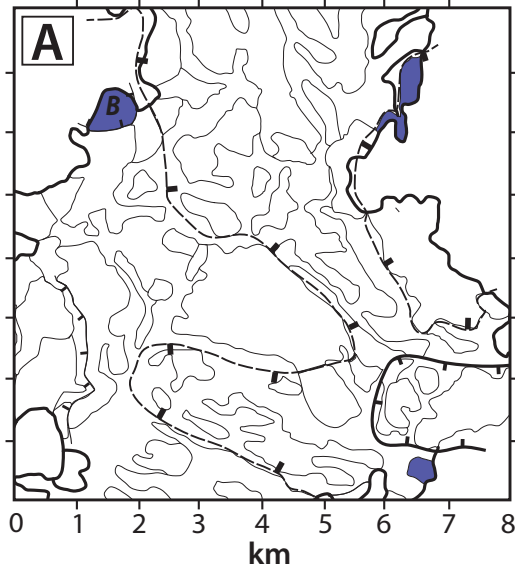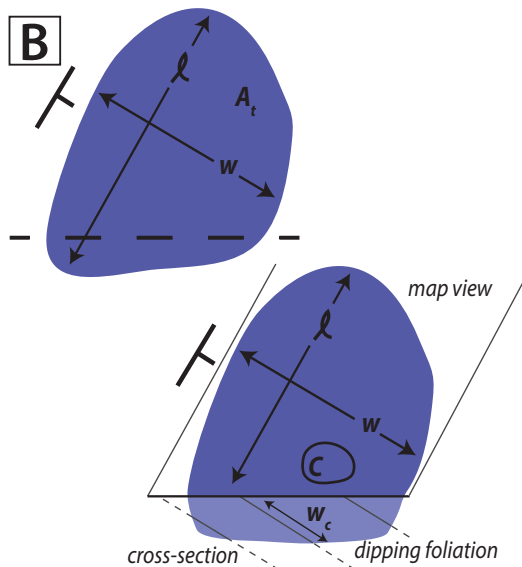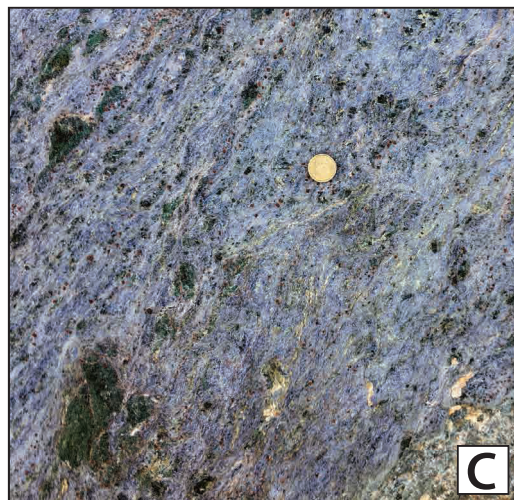

*Representative outcrop*

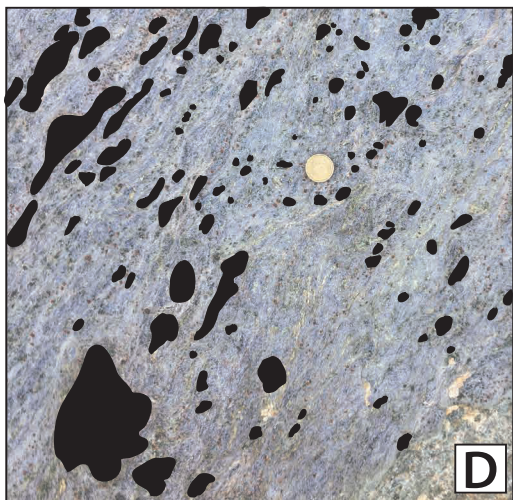

*" $R_{hm}$ " is a ratio of heterogeneities (black areas) to matrix*

Supplement: Supplementary file 1 [file 22411647 › Supplemental Material 1.pdf]
